# Supplementary material
Source: Springer Nature journal article supplement (https://www.springermedizin.de/resource/supplementary/12894_2013_403_MOESM2_ESM.pdf/9513552)

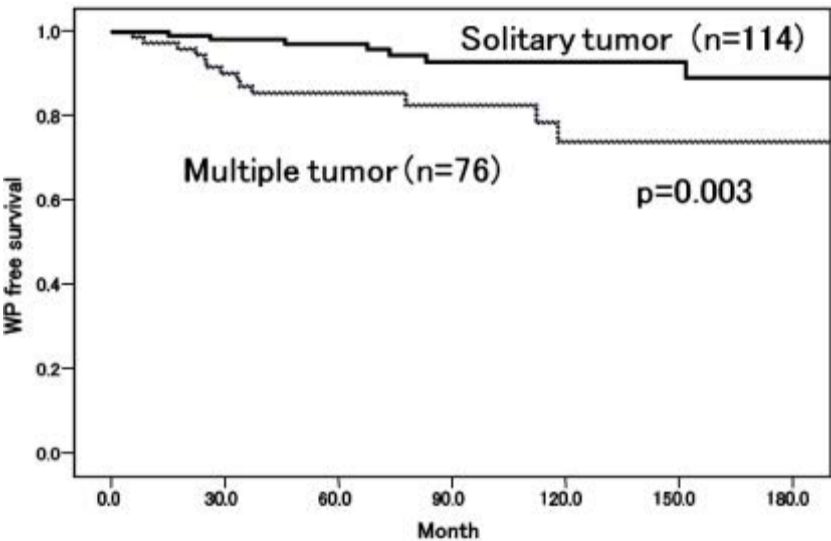

Supplement: MOESM2 [file 9513552]
